# Supplementary material for: The fibroblast-derived paracrine factor neuregulin-1 has a novel role in regulating the constitutive color and melanocyte function in human skin
Source: Oxford University Press journal article supplement (doi:10.1242/jcs.064774), 2010-08-25
Supplement: jcs064774-sup-064774tables1.pdf [file jcs064774-sup-064774tables1.pdf]

**Table S1. Effects of fibroblast on pigmentation of MelanoDerm Skin Model.**

Fibroblasts from 3 different subjects for each skin type (I, III or VI) were used (n=3). LA represents treatment with 30  $\mu$ M lipoic acid used as a positive control. Control represents treatment with no fibroblasts as a negative control. Viability was measured using the MTT assay and melanogenesis was evaluated using the L-[ $^{14}$ C]tyrosine assay; Results are shown as means  $\pm$  SEM. Data adapted from Choi et al., 2008.

|                      | <b>Viability</b> | <b>Melanogenesis</b> |
|----------------------|------------------|----------------------|
| <b>Control</b>       | 100%             | 100%                 |
| <b>Skin type I</b>   | 107 $\pm$ 11%    | 65 $\pm$ 18%         |
| <b>Skin type III</b> | 103 $\pm$ 4%     | 66 $\pm$ 20%         |
| <b>Skin type VI</b>  | 91 $\pm$ 19%     | 93 $\pm$ 22%         |
| <b>Lipoic acid</b>   | 88 $\pm$ 14 %    | 2 $\pm$ 2%           |
